# Supplementary material
Source: publisher site journal article supplement (https://neobiota.pensoft.net/article/31619/download/suppl/31/)

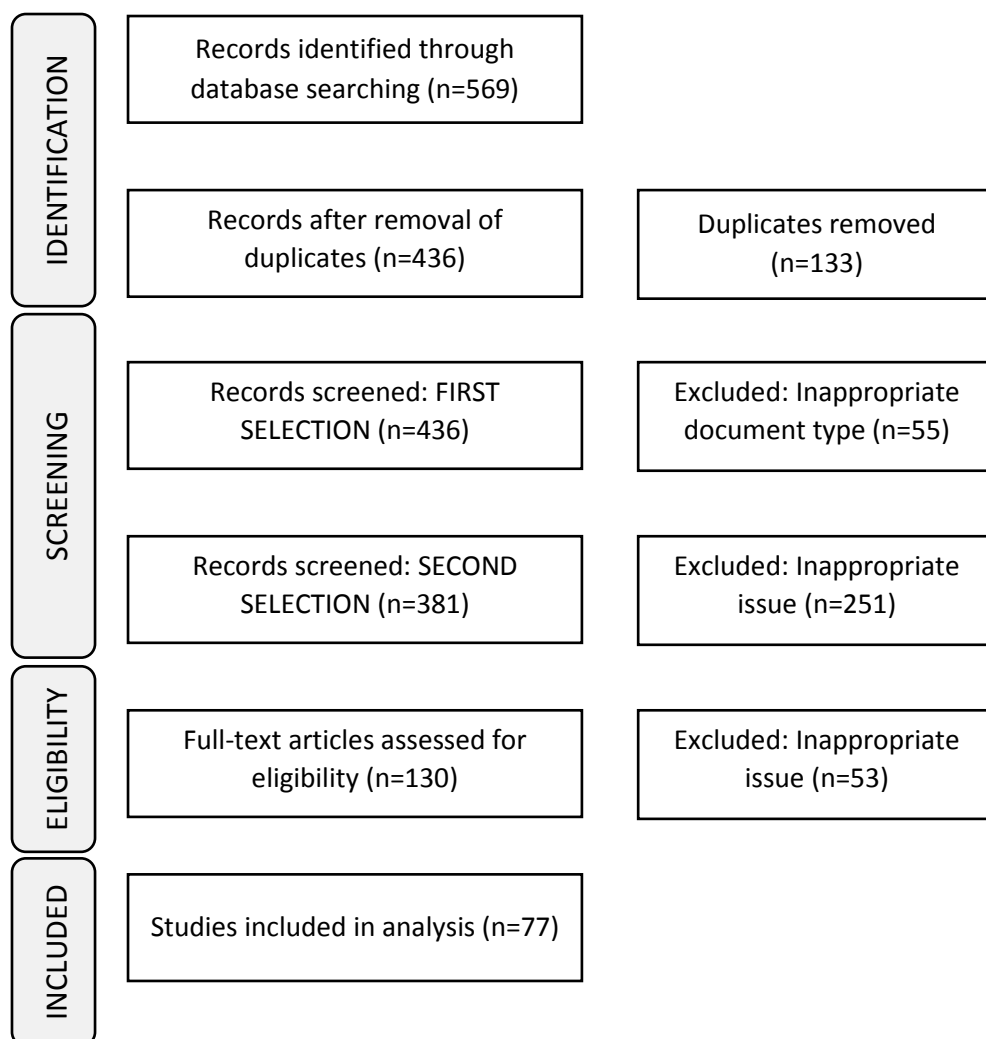

**Supplementary File 1. Flow diagram of the selection process used in this systematic review.**

Supplement: Supplementary file 1
